# Supplementary material for: Protein Loop Modeling Using a New Hybrid Energy Function and Its Application to Modeling in Inaccurate Structural Environments
Source: PubMed Central journal article supplement (PMC4242723; doi:10.1371/journal.pone.0113811), 2014-11-24
Supplement: pone.0113811.s002.pdf [file pone.0113811.s002.pdf]

**Table S1. Loop reconstruction results for the 8-residue loop Set 1.**

| PDB ID           | Loop range | Native framework,<br>RMSD (Å) <sup>1)</sup> |                      |                   |                          |                          |                                   |
|------------------|------------|---------------------------------------------|----------------------|-------------------|--------------------------|--------------------------|-----------------------------------|
|                  |            | HLP <sup>2)</sup>                           | HLP-SS <sup>2)</sup> | NGK <sup>3)</sup> | Galaxy PS1 <sup>4)</sup> | Galaxy PS2 <sup>5)</sup> | Best sampled (rank) <sup>6)</sup> |
| 135l             | 84–91      | 0.4                                         | 2.6                  | 0.3               | 1.5                      | 0.5                      | 0.5 (1)                           |
| 1alc             | 34–41      | 5.9                                         | 4.5                  | 0.3               | 0.3                      | 0.4                      | 0.4 (1)                           |
| 1btl             | 50–57      | 0.3                                         | 1.6                  | 0.4               | 1.5                      | 1.2                      | 0.8 (2)                           |
| 1cex             | 73–80      | 3.9                                         | 3.7                  | 0.3               | 0.7                      | 1.1                      | 0.5 (6)                           |
| 1clc             | 313–320    | 0.3                                         | 3.0                  | 0.4               | 0.4                      | 0.3                      | 0.3 (1)                           |
| 1ddt             | 127–134    | 1.0                                         | 0.9                  | 1.0               | 1.1                      | 1.0                      | 1.0 (1)                           |
| 1ezm             | 92–99      | 0.4                                         | 0.5                  | 0.3               | 2.3                      | 0.6                      | 0.4 (2)                           |
| 1hfc             | 142–149    | 0.2                                         | 0.3                  | 0.5               | 0.9                      | 0.6                      | 0.5 (4)                           |
| 1iab             | 48–55      | 1.6                                         | 0.8                  | 0.5               | 2.1                      | 1.9                      | 0.6 (4)                           |
| 1ivd             | 413–420    | 0.9                                         | 1.1                  | 0.8               | 3.5                      | 2.9                      | 0.8 (12)                          |
| 1lst             | 101–108    | 0.6                                         | 0.7                  | 0.5               | 0.6                      | 0.5                      | 0.4 (4)                           |
| 1nar             | 192–199    | 0.6                                         | 1.5                  | 1.3               | 2.6                      | 2.0                      | 1.0 (5)                           |
| 1oyc             | 80–87      | 0.5                                         | 0.4                  | 0.3               | 0.6                      | 0.5                      | 0.5 (3)                           |
| 1prn             | 150–157    | 1.7                                         | 2.4                  | 0.3               | 1.6                      | 0.5                      | 0.5 (1)                           |
| 1sbp             | 107–114    | 3.3                                         | 0.3                  | 0.3               | 0.5                      | 0.3                      | 0.3 (1)                           |
| 1tml             | 187–194    | 0.3                                         | 1.4                  | 0.5               | 1.6                      | 0.9                      | 0.5 (5)                           |
| 2cmd             | 270–277    | 0.4                                         | 0.4                  | 0.4               | 0.6                      | 0.5                      | 0.5 (5)                           |
| 2exo             | 262–269    | 0.4                                         | 0.4                  | 0.3               | 0.9                      | 0.5                      | 0.3 (4)                           |
| 2sga             | 32–43      | 1.2                                         | 1.2                  | 1.3               | 1.1                      | 0.9                      | 0.3 (3)                           |
| 5p21             | 45–52      | 0.4                                         | 0.9                  | 0.3               | 0.8                      | 0.3                      | 0.3 (1)                           |
| <b>Average</b>   |            | <b>1.2</b>                                  | <b>1.4</b>           | <b>0.5</b>        | <b>1.3</b>               | <b>0.9</b>               | <b>0.5 (3.3)</b>                  |
| <b>Std. dev.</b> |            | <b>1.5</b>                                  | <b>1.2</b>           | <b>0.3</b>        | <b>0.8</b>               | <b>0.7</b>               | <b>0.2 (2.6)</b>                  |

- 1) RMSD is calculated as the root-mean-square deviation of the main-chain atoms N, C<sub>α</sub>, C, and O.
- 2) Taken from Sellers *et al.* [1]
- 3) Results of the best-score models sampled by Next-generation KIC (NGK) using the protocol provided by Stein *et al.* [2]. 500 models were generated for each target as in Stein *et al.* The Rosetta program v3.5 was used.
- 4) Results of the lowest-energy model structures obtained by GalaxyLoop-PS1
- 5) Results of the lowest-energy model structures obtained by GalaxyLoop-PS2
- 6) RMSDs of the lowest-RMSD model structures and their energy ranks in the final bank

[1] Sellers BD, Zhu K, Zhao S, Friesner RA, Jacobson MP (2008) Toward better refinement of comparative models: predicting loops in inexact environments. *Proteins* 72: 959-971.

[2] Stein A, Kortemme T (2013) Improvements to robotics-inspired conformational sampling in rosetta. PLoS One 8: e63090.
