# Supplementary material for: Protein Loop Modeling Using a New Hybrid Energy Function and Its Application to Modeling in Inaccurate Structural Environments
Source: PubMed Central journal article supplement (PMC4242723; doi:10.1371/journal.pone.0113811), 2014-11-24
Supplement: pone.0113811.s004.pdf [file pone.0113811.s004.pdf]

**Table S3. Loop reconstruction results for the 12-residue loop Set 2**

| PDB ID           | Loop range | RMSD (Å) <sup>1)</sup>    |                   |                          |                          |                                   |
|------------------|------------|---------------------------|-------------------|--------------------------|--------------------------|-----------------------------------|
|                  |            | Rosetta KIC <sup>2)</sup> | NGK <sup>3)</sup> | Galaxy PS1 <sup>4)</sup> | Galaxy PS2 <sup>5)</sup> | Best sampled (rank) <sup>6)</sup> |
| 154l             | 153–164    | 3.3                       | 3.4               | 3.6                      | 3.6                      | 2.0 (38)                          |
| 1arp             | 201–212    | 0.5                       | 0.3               | 0.8                      | 0.4                      | 0.4 (1)                           |
| 1ctm             | 9–20       | 2.9                       | 0.7               | 4.8                      | 5.9                      | 3.3 (4)                           |
| 1dts             | 41–52      | 5.2                       | 1.1               | 7.2                      | 1.6                      | 1.1 (4)                           |
| 1eco             | 35–46      | 0.4                       | 0.4               | 1.6                      | 0.7                      | 0.7 (1)                           |
| 1ede             | 150–161    | 0.7                       | 1.2               | 3.3                      | 2.6                      | 0.8 (50)                          |
| 1ezm             | 122–133    | 2.7                       | 2.7               | 5.1                      | 0.3                      | 0.39 (2)                          |
| 1hfc             | 165–176    | 8.2                       | 8.1               | 4.4                      | 7.3                      | 2.0 (5)                           |
| 1msc*            | 365–376    | 3.2                       | 5.7               | 4.5                      | 4.6                      | 1.4 (35)                          |
| 1onc             | 23–34      | 0.5                       | 8.6               | 1.8                      | 2.4                      | 1.0 (19)                          |
| 1pbe             | 129–140    | 0.6                       | 0.5               | 1.0                      | 1.8                      | 0.6 (2)                           |
| 1pmy             | 77–88      | 2.6                       | 0.5               | 0.7                      | 0.5                      | 0.5 (1)                           |
| 1prn             | 15–26      | 6.6                       | 6.5               | 4.0                      | 6.1                      | 4.0 (47)                          |
| 1rcf             | 88–99      | 0.6                       | 0.5               | 2.9                      | 4.1                      | 0.8 (11)                          |
| 1rro             | 17–28      | 0.4                       | 0.5               | 2.5                      | 2.3                      | 0.7 (11)                          |
| 1srp             | 311–322    | 0.6                       | 0.3               | 0.5                      | 0.5                      | 0.4 (3)                           |
| 1tca             | 305–316    | 0.6                       | 0.5               | 2.5                      | 2.3                      | 0.5 (21)                          |
| 1thg             | 127–138    | 1.1                       | 1.1               | 2.9                      | 2.5                      | 1.6 (12)                          |
| 1thw             | 178–189    | 2.7                       | 0.8               | 2.6                      | 2.2                      | 1.1 (5)                           |
| 1tib             | 99–110     | 1.2                       | 1.8               | 1.5                      | 1.2                      | 1.2 (1)                           |
| 1tml             | 243–254    | 0.4                       | 0.3               | 2.4                      | 1.6                      | 0.9 (9)                           |
| 1xif             | 203–214    | 0.7                       | 0.5               | 1.7                      | 1.8                      | 0.9 (5)                           |
| 2cpl             | 145–156    | 0.2                       | 0.2               | 5.2                      | 5.8                      | 1.0 (47)                          |
| 2ebn             | 136–147    | 2.1                       | 2.2               | 2.1                      | 2.5                      | 1.4 (6)                           |
| 2exo             | 293–304    | 0.8                       | 0.4               | 4.6                      | 0.3                      | 0.3 (1)                           |
| 2pgd             | 361–372    | 5.1                       | 0.6               | 2.0                      | 3.0                      | 0.6 (11)                          |
| 2rn2             | 90–101     | 0.8                       | 1.1               | 5.8                      | 6.8                      | 5.1 (46)                          |
| 2sil             | 255–266    | 1.0                       | 1.8               | 1.6                      | 1.1                      | 0.6 (6)                           |
| 2tgi             | 48–59      | 3.1                       | 2.0               | 1.6                      | 2.1                      | 0.8 (38)                          |
| 3hsc             | 72–83      | 0.5                       | 0.5               | 4.5                      | 0.4                      | 0.4 (1)                           |
| 451c             | 16–27      | 5.8                       | 6.5               | 9.0                      | 0.8                      | 0.8 (5)                           |
| 4enl             | 372–383    | 3.6                       | 2.9               | 5.1                      | 0.6                      | 0.6 (1)                           |
| 4i1b             | 46–57      | 3.8                       | 5.2               | 4.2                      | 5.1                      | 1.5 (17)                          |
| <b>Average</b>   |            | <b>2.2</b>                | <b>2.0</b>        | <b>3.2</b>               | <b>2.5</b>               | <b>1.2 (14.4)</b>                 |
| <b>Std. dev.</b> |            | <b>2.1</b>                | <b>2.3</b>        | <b>1.9</b>               | <b>2.0</b>               | <b>1.1 (16.5)</b>                 |

\* For 1msc, crystal symmetry was considered by all methods except Rosetta KIC. Therefore, the reported average value is calculated for 32 targets, excluding 1msc.

1) RMSD is calculated as the root-mean-square deviation of the main-chain atoms N, C<sub>α</sub>, C, and O.

- 2) Taken from Mandell *et al.* [1]
- 3) Results of the best-score models sampled by Next-generation KIC (NGK) using the protocol provided by Stein *et al.* [2]. 500 models were generated for each target as in Stein *et al.* The Rosetta program v3.5 was used.
- 4) Results of the lowest-energy model structures obtained by GalaxyLoop-PS1
- 5) Results of the lowest-energy model structures obtained by GalaxyLoop-PS2
- 6) RMSDs of the lowest-RMSD model structures and their energy ranks in the final bank

[1] Sellers BD, Zhu K, Zhao S, Friesner RA, Jacobson MP (2008) Toward better refinement of comparative models: predicting loops in inexact environments. *Proteins* 72: 959-971.

[2] Stein A, Kortemme T (2013) Improvements to robotics-inspired conformational sampling in rosetta. *PLoS One* 8: e63090.
