# Supplementary material for: Protein Loop Modeling Using a New Hybrid Energy Function and Its Application to Modeling in Inaccurate Structural Environments
Source: PubMed Central journal article supplement (PMC4242723; doi:10.1371/journal.pone.0113811), 2014-11-24
Supplement: pone.0113811.s006.pdf [file pone.0113811.s006.pdf]

**Table S5. Loop modeling results on the perturbed crystal structures for the 12-residue loop Set**

1.

| PDB ID           | Loop range | Side chain-perturbed set<br>RMSD (Å) <sup>1)</sup> |                   |                      |                           |                   |                          |                          |                                   | Backbone-perturbed set<br>RMSD (Å) <sup>1)</sup> |                   |                          |                          |                                   |
|------------------|------------|----------------------------------------------------|-------------------|----------------------|---------------------------|-------------------|--------------------------|--------------------------|-----------------------------------|--------------------------------------------------|-------------------|--------------------------|--------------------------|-----------------------------------|
|                  |            | E-RMSD (Å) <sup>2)</sup>                           | HLP <sup>3)</sup> | HLP-SS <sup>3)</sup> | Rosetta KIC <sup>4)</sup> | NGK <sup>5)</sup> | Galaxy PS1 <sup>6)</sup> | Galaxy PS2 <sup>7)</sup> | Best sampled (rank) <sup>8)</sup> | E-RMSD (Å) <sup>2)</sup>                         | NGK <sup>5)</sup> | Galaxy PS1 <sup>6)</sup> | Galaxy PS2 <sup>7)</sup> | Best sampled (rank) <sup>8)</sup> |
| 1a8d             | 155–166    | 0.7                                                | 0.9               | 2.8                  | 0.6                       | 5.2               | 4.1                      | 0.5                      | 0.5 (1)                           | 1.6                                              | 3.7               | 4.5                      | 3.1                      | 1.3 (2)                           |
| 1arb             | 182–193    | 0.9                                                | 2.2               | 2.6                  | 1.4                       | 0.4               | 3.7                      | 1.0                      | 1.0 (7)                           | 2.3                                              | 1.7               | 2.1                      | 1.9                      | 1.4 (31)                          |
| 1bhe             | 121–132    | 0.8                                                | 1.0               | 0.7                  | 0.7                       | 0.4               | 1.0                      | 2.0                      | 0.8 (10)                          | 1.2                                              | 1.7               | 2.3                      | 3.5                      | 2.8 (20)                          |
| 1bn8             | 298–309    | 0.7                                                | 8.3               | 2.6                  | 0.6                       | 1.1               | 5.4                      | 1.6                      | 0.8 (14)                          | 3.4                                              | 1.1               | 4.3                      | 1.1                      | 1.1 (1)                           |
| 1c5e             | 82–93      | 0.7                                                | 1.8               | 1.7                  | 0.4                       | 0.4               | 2.7                      | 0.5                      | 0.5 (1)                           | 1.5                                              | 1.2               | 2.2                      | 1.5                      | 0.8 (22)                          |
| 1cb0             | 33–44      | 0.8                                                | 0.4               | 0.3                  | 0.7                       | 0.6               | 0.7                      | 0.5                      | 0.5 (1)                           | 2.7                                              | 0.9               | 5.7                      | 0.9                      | 0.9 (2)                           |
| 1cnv             | 188–199    | 0.7                                                | 3.2               | 3.3                  | 2.1                       | 2.0               | 4.4                      | 3.2                      | 2.7 (2)                           | 3.0                                              | 6.3               | 6.4                      | 6.5                      | 6.2 (7)                           |
| 1cs6             | 145–156    | 1.1                                                | 3.4               | 3.5                  | 3.0                       | 2.5               | 1.8                      | 3.1                      | 2.8 (7)                           | 1.8                                              | 1.1               | 1.7                      | 1.6                      | 1.2 (10)                          |
| 1dqz             | 209–220    | 1.2                                                | 1.2               | 0.6                  | 2.6                       | 0.6               | 2.2                      | 1.0                      | 1.0 (1)                           | 1.9                                              | 7.5               | 1.5                      | 3.3                      | 1.8 (23)                          |
| 1exm             | 291–302    | 0.8                                                | 4.0               | 0.5                  | 0.9                       | 1.0               | 2.4                      | 1.2                      | 1.2 (1)                           | 1.5                                              | 1.1               | 3.0                      | 1.3                      | 1.1 (6)                           |
| 1f46             | 64–75      | 0.9                                                | 3.8               | 1.1                  | 2.3                       | 2.1               | 1.5                      | 1.5                      | 1.4 (41)                          | 1.6                                              | 2.6               | 4.5                      | 3.8                      | 2.3 (32)                          |
| 1i7p             | 63–74      | 0.9                                                | 0.5               | 0.3                  | 0.4                       | 0.4               | 2.8                      | 0.3                      | 0.3 (1)                           | 3.3                                              | 1.9               | 2.8                      | 1.7                      | 1.5 (4)                           |
| 1m3s             | 68–79      | 1.1                                                | 5.3               | 5.6                  | 5.6                       | 6.4               | 5.8                      | 5.9                      | 4.7 (36)                          | 1.5                                              | 3.2               | 4.3                      | 2.7                      | 2.7 (23)                          |
| 1ms9             | 529–540    | 0.8                                                | 2.9               | 2.5                  | 1.0                       | 2.7               | 1.9                      | 2.6                      | 1.2 (13)                          | 1.6                                              | 1.8               | 1.8                      | 1.8                      | 0.9 (37)                          |
| 1my7             | 254–265    | 1.5                                                | 1.4               | 0.9                  | 2.3                       | 0.6               | 3.6                      | 2.9                      | 0.6 (2)                           | 4.0                                              | 0.9               | 2.4                      | 1.0                      | 1.0 (1)                           |
| 1oth             | 69–80      | 1.1                                                | 2.3               | 0.7                  | 0.6                       | 0.4               | 1.1                      | 2.3                      | 1.5 (6)                           | 1.2                                              | 0.8               | 1.1                      | 0.9                      | 0.9 (8)                           |
| 1oyc             | 203–214    | 1.2                                                | 2.8               | 1.2                  | 3.9                       | 0.4               | 3.3                      | 1.4                      | 1.2 (22)                          | 2.5                                              | 0.7               | 2.7                      | 1.2                      | 1.2 (2)                           |
| 1qlw             | 31–42      | 0.6                                                | 1.5               | 1.4                  | 0.9                       | 4.8               | 4.6                      | 4.6                      | 2.7 (23)                          | 2.3                                              | 6.0               | 2.5                      | 2.9                      | 1.5 (43)                          |
| 1t1d             | 127–138    | 1.3                                                | 0.6               | 1.0                  | 0.8                       | 0.7               | 3.3                      | 1.0                      | 1.0 (1)                           | 4.0                                              | 1.3               | 2.5                      | 1.5                      | 1.2 (2)                           |
| 2pia             | 30–41      | 1.1                                                | 3.7               | 0.5                  | 0.9                       | 0.8               | 4.4                      | 5.5                      | 1.0 (16)                          | 1.2                                              | 0.7               | 4.5                      | 0.7                      | 0.7 (2)                           |
| <b>Average</b>   |            | <b>1.0</b>                                         | <b>2.6</b>        | <b>1.7</b>           | <b>1.6</b>                | <b>1.7</b>        | <b>3.0</b>               | <b>2.1</b>               | <b>1.4 (10.3)</b>                 | <b>2.2</b>                                       | <b>2.3</b>        | <b>3.2</b>               | <b>2.1</b>               | <b>1.6 (13.9)</b>                 |
| <b>Std. dev.</b> |            | <b>0.2</b>                                         | <b>1.9</b>        | <b>1.4</b>           | <b>1.4</b>                | <b>1.8</b>        | <b>1.4</b>               | <b>1.6</b>               | <b>1.0 (11.7)</b>                 | <b>0.9</b>                                       | <b>2.0</b>        | <b>1.4</b>               | <b>1.4</b>               | <b>1.2 (13.3)</b>                 |

- 1) RMSD is calculated as the root-mean-square deviation of the main-chain atoms N, C<sub>α</sub>, C, and O.
- 2) The all-atom RMSD of the environment is as defined in Results and Discussion
- 3) Taken from Sellers *et al.* [1]
- 4) Taken from Mandell *et al.* [2]
- 5) Results of the best-score models sampled by Next-generation KIC (NGK) using the protocol provided by Stein *et al.* [3]. 500 models were generated for each as in Stein *et al.* The Rosetta program v3.5 was used.
- 6) Results of the lowest-energy model structures obtained by GalaxyLoop-PS1
- 7) Results of the lowest-energy model structures obtained by GalaxyLoop-PS2

8) RMSDs of the lowest-RMSD model structures and their energy ranks in the final bank

[1] Sellers BD, Zhu K, Zhao S, Friesner RA, Jacobson MP (2008) Toward better refinement of comparative models: predicting loops in inexact environments. *Proteins* 72: 959-971.

[2] Mandell DJ, Coutsiaris EA, Kortemme T (2009) Sub-angstrom accuracy in protein loop reconstruction by robotics-inspired conformational sampling. *Nature Methods* 6: 551-552.

[3] Stein A, Kortemme T (2013) Improvements to robotics-inspired conformational sampling in rosetta. *PLoS One* 8: e63090.
