# Supplementary material for: Protein Loop Modeling Using a New Hybrid Energy Function and Its Application to Modeling in Inaccurate Structural Environments
Source: PubMed Central journal article supplement (PMC4242723; doi:10.1371/journal.pone.0113811), 2014-11-24
Supplement: pone.0113811.s007.pdf [file pone.0113811.s007.pdf]

**Table S6. RMSD results of the modeled loops for template-based models.**

| PDB ID           | Loop region (length) | Model quality        |                          |                               | Loop RMSD (Å) <sup>4)</sup> |                                     |                              |                            |                   |                              |                              |                                          |
|------------------|----------------------|----------------------|--------------------------|-------------------------------|-----------------------------|-------------------------------------|------------------------------|----------------------------|-------------------|------------------------------|------------------------------|------------------------------------------|
|                  |                      | GDT-TS <sup>1)</sup> | E-RMSD (Å) <sup>2)</sup> | Anchor RMSD (Å) <sup>3)</sup> | MODEL-<br>LER <sup>5)</sup> | PS-<br>know-<br>ledge <sup>6)</sup> | PS-<br>Physics <sup>7)</sup> | Mod-<br>Loop <sup>8)</sup> | NGK <sup>9)</sup> | Galaxy<br>PS1 <sup>10)</sup> | Galaxy<br>PS2 <sup>11)</sup> | Best<br>sampled<br>(rank) <sup>12)</sup> |
| 1d2kA            | 349–354 (6)          | 83.2                 | 1.6                      | 0.9                           | 2.5                         | 4.0                                 | 3.9                          | 2.0                        | 1.9               | 4.0                          | 5.7                          | 1.7 (21)                                 |
| 1a49A            | 86–94 (9)            | 70.5                 | 1.6                      | 1.0                           | 3.4                         | 3.4                                 | 4.8                          | 3.4                        | 4.6               | 3.8                          | 4.2                          | 3.3 (14)                                 |
| 1gpb             | 261–271 (11)         | 89.3                 | 1.8                      | 1.5                           | 9.6                         | 5.2                                 | 5.6                          | 1.9                        | 4.3               | 4.4                          | 3.0                          | 1.9 (14)                                 |
| 1qu9A            | 93–98 (6)            | 89.7                 | 1.8                      | 2.7                           | 7.4                         | 6.3                                 | 5.8                          | 8.7                        | 7.0               | 6.6                          | 6.3                          | 6.3 (7)                                  |
| 1avk             | 20–29 (10)           | 86.6                 | 1.9                      | 1.9                           | 2.9                         | 3.6                                 | 3.8                          | 3.1                        | 1.2               | 1.2                          | 1.5                          | 1.3 (4)                                  |
| 3fib             | 40–47 (8)            | 88.5                 | 2.0                      | 0.7                           | 2.3                         | 2.4                                 | 2.7                          | 4.1                        | 2.8               | 2.8                          | 2.6                          | 2.1 (9)                                  |
| 1e0cA            | 53–60 (8)            | 82.4                 | 2.2                      | 2.1                           | 3.5                         | 6.5                                 | 3.3                          | 3.7                        | 3.8               | 6.7                          | 5.9                          | 2.9 (20)                                 |
| 1esl             | 40–48 (9)            | 84.2                 | 2.1                      | 1.4                           | 2.4                         | 2.6                                 | 3.0                          | 3.5                        | 3.0               | 3.2                          | 2.4                          | 2.2 (22)                                 |
| 1bucA            | 61–68 (8)            | 88.0                 | 2.2                      | 1.8                           | 2.7                         | 2.3                                 | 2.7                          | 4.5                        | 5.3               | 3.9                          | 3.2                          | 2.2 (17)                                 |
| 2oatA            | 347–353 (7)          | 80.6                 | 2.3                      | 1.6                           | 5.3                         | 1.9                                 | 5.0                          | 3.6                        | 2.7               | 3.0                          | 5.0                          | 2.3 (27)                                 |
| 1qdlB            | 59–67 (9)            | 88.2                 | 2.3                      | 1.6                           | 2.1                         | 2.8                                 | 2.4                          | 4.8                        | 4.2               | 2.7                          | 2.8                          | 2.4 (16)                                 |
| 2polA            | 23–32 (10)           | 77.7                 | 2.7                      | 2.2                           | 4.1                         | 4.0                                 | 3.5                          | 3.2                        | 2.8               | 4.3                          | 3.7                          | 1.3 (23)                                 |
| 1esl             | 54–59 (6)            | 84.2                 | 2.8                      | 1.0                           | 2.2                         | 2.4                                 | 2.1                          | 1.8                        | 1.8               | 2.6                          | 1.5                          | 1.5 (1)                                  |
| 1rsy             | 74–79 (6)            | 88.9                 | 2.8                      | 0.8                           | 4.1                         | 3.5                                 | 6.6                          | 3.9                        | 4.0               | 3.0                          | 3.1                          | 2.9 (19)                                 |
| 1tml             | 45–50 (6)            | 77.7                 | 3.0                      | 2.3                           | 6.3                         | 5.1                                 | 4.8                          | 3.2                        | 5.4               | 4.7                          | 5.1                          | 2.7 (30)                                 |
| 1f3g             | 123–131 (9)          | 88.3                 | 3.0                      | 2.4                           | 3.8                         | 2.9                                 | 4.5                          | 3.5                        | 4.0               | 3.5                          | 3.3                          | 3.2 (2)                                  |
| 1a49A            | 463–472 (10)         | 70.5                 | 3.3                      | 0.9                           | 3.9                         | 4.9                                 | 8.1                          | 3.8                        | 5.0               | 2.3                          | 2.7                          | 1.6 (24)                                 |
| 1csn             | 216–223 (8)          | 89.2                 | 3.0                      | 2.6                           | 8.1                         | 8.9                                 | 8.7                          | 6.3                        | 6.5               | 8.8                          | 6.1                          | 5.8 (6)                                  |
| 1ialA            | 32–42 (11)           | 78.3                 | 4.0                      | 2.6                           | 4.5                         | 5.1                                 | 6.4                          | 7.6                        | 6.8               | 4.6                          | 4.0                          | 3.6 (23)                                 |
| 1df6A            | 10–15 (6)            | 70.8                 | 4.0                      | 2.0                           | 3.2                         | 3.3                                 | 3.3                          | 3.4                        | 3.2               | 3.1                          | 3.2                          | 3.1 (12)                                 |
| 1kbt             | 26–31 (6)            | 70.8                 | 2.8                      | 2.4                           | 3.8                         | 3.8                                 | 4.5                          | 4.2                        | 3.9               | 3.4                          | 3.5                          | 2.9 (27)                                 |
| 1aszA            | 313–322 (10)         | 73.6                 | 4.8                      | 2.1                           | 4.4                         | 2.4                                 | 4.6                          | 1.8                        | 2.9               | 2.3                          | 1.9                          | 1.7 (2)                                  |
| 1lxa             | 102–107 (6)          | 71.8                 | 5.3                      | 2.7                           | 3.2                         | 4.3                                 | 4.7                          | 5.5                        | 3.6               | 3.8                          | 4.7                          | 3.7 (23)                                 |
| <b>Average</b>   |                      | <b>81.4</b>          | <b>2.8</b>               | <b>1.8</b>                    | <b>4.2</b>                  | <b>4.0</b>                          | <b>4.5</b>                   | <b>4.0</b>                 | <b>3.9</b>        | <b>3.9</b>                   | <b>3.7</b>                   | <b>2.7 (15.8)</b>                        |
| <b>Std. dev.</b> |                      | <b>7.0</b>           | <b>1.0</b>               | <b>0.6</b>                    | <b>1.9</b>                  | <b>1.6</b>                          | <b>1.7</b>                   | <b>1.7</b>                 | <b>1.5</b>        | <b>1.6</b>                   | <b>1.4</b>                   | <b>1.2 (8.7)</b>                         |

- 1) GDT-TS [1] of the initial template-based model
- 2) The all-atom RMSD of the environment is as defined in Results and Discussion.
- 3) All-atom RMSDs of 3 residues before and 3 residues after the loop region
- 4) The RMSD is calculated as root-mean-square deviation of the main-chain atoms N, C<sub>α</sub>, C, and O.
- 5) Loop RMSD of the initial model obtained by MODELLER [2]
- 6) Results of the lowest-energy model structures obtained by PS-knowledge, the same procedure as GalaxyLoop-PS2 but using the energy function mainly composed of statistical energy terms
- 7) Results of the lowest-energy model structures obtained by PS-physics, the same procedure as GalaxyLoop-PS2 but using the energy function composed of only physics-based energy terms

- 8) Results of the lowest-energy model obtained by the loop refinement algorithm of ModLoop of MODELLER [3,4] are reported. From the same initial template-based model, 500 independent optimizations were performed at the refinement level 'slow' (in contrast to the default option of the ModLoop 'server' that performs 300 optimizations).
- 9) Results of the best-score models sampled by Next-generation KIC (NGK) using the protocol provided by Stein *et al.* [5]. 500 models were generated for each target as in Stein *et al.* The Rosetta program v3.5 was used.
- 10) Results of the lowest-energy model structures obtained by GalaxyLoop-PS1
- 11) Results of the lowest-energy model structures obtained by GalaxyLoop-PS2
- 12) RMSDs of the lowest-RMSD model structures and their energy ranks in the final bank

[1] Mariani V, Kiefer F, Schmidt T, Haas J, Schwede T (2011) Assessment of template based protein structure predictions in CASP9. *Proteins* 79 Suppl 10: 37-58.

[2] Sali A, Blundell TL (1993) Comparative Protein Modeling by Satisfaction of Spatial Restraints. *Journal of Molecular Biology* 234: 779-815.

[3] Fiser A, Do RKG, Sali A (2000) Modeling of loops in protein structures. *Protein Science* 9: 1753-1773.

[4] Fiser A, Sali A (2003) ModLoop: automated modeling of loops in protein structures. *Bioinformatics* 19: 2500-2501.

[5] Stein A, Kortemme T (2013) Improvements to robotics-inspired conformational sampling in rosetta. *PLoS One* 8: e63090.
