# Supplementary material for: Protein Loop Modeling Using a New Hybrid Energy Function and Its Application to Modeling in Inaccurate Structural Environments
Source: PubMed Central journal article supplement (PMC4242723; doi:10.1371/journal.pone.0113811), 2014-11-24
Supplement: pone.0113811.s008.pdf [file pone.0113811.s008.pdf]

**Table S7. Loop reconstruction results and modeling results on perturbed crystal structures for the 12-residue loop Set 1 using energy functions composed of either knowledge-based or physics-based energy components.**

| PDB ID           | Native framework<br>RMSD (Å) <sup>1)</sup> |                              | Side chain-perturbed set<br>RMSD (Å) <sup>1)</sup> |                                    |                              | Backbone-perturbed set<br>RMSD (Å) <sup>1)</sup> |                                    |                              |
|------------------|--------------------------------------------|------------------------------|----------------------------------------------------|------------------------------------|------------------------------|--------------------------------------------------|------------------------------------|------------------------------|
|                  | PS-<br>know<br>ledge <sup>2)</sup>         | PS-<br>physics <sup>3)</sup> | E-<br>RMSD<br>(Å) <sup>4)</sup>                    | PS-<br>know<br>ledge <sup>2)</sup> | PS-<br>physics <sup>3)</sup> | E-<br>RMSD<br>(Å) <sup>4)</sup>                  | PS-<br>know<br>ledge <sup>2)</sup> | PS-<br>physics <sup>3)</sup> |
| 1a8d             | 0.4                                        | 3.0                          | 0.7                                                | 0.5                                | 4.3                          | 1.6                                              | 1.2                                | 4.3                          |
| 1arb             | 1.3                                        | 1.1                          | 0.9                                                | 2.1                                | 1.1                          | 2.3                                              | 1.5                                | 1.4                          |
| 1bhe             | 2.1                                        | 0.7                          | 0.8                                                | 0.8                                | 2.5                          | 1.2                                              | 3.1                                | 1.1                          |
| 1bn8             | 0.6                                        | 4.7                          | 0.7                                                | 0.9                                | 1.1                          | 3.4                                              | 1.1                                | 5.2                          |
| 1c5e             | 2.2                                        | 0.5                          | 0.7                                                | 2.1                                | 2.2                          | 1.5                                              | 1.5                                | 1.2                          |
| 1cb0             | 0.5                                        | 0.9                          | 0.8                                                | 0.6                                | 1.4                          | 2.7                                              | 0.8                                | 1.1                          |
| 1cnv             | 4.2                                        | 2.5                          | 0.7                                                | 4.5                                | 6.6                          | 3.0                                              | 6.6                                | 6.4                          |
| 1cs6             | 1.9                                        | 2.0                          | 1.1                                                | 3.3                                | 3.0                          | 1.8                                              | 1.5                                | 3.8                          |
| 1dqz             | 3.4                                        | 6.2                          | 1.2                                                | 2.9                                | 2.9                          | 1.9                                              | 3.2                                | 7.5                          |
| 1exm             | 0.8                                        | 3.4                          | 0.8                                                | 2.5                                | 2.7                          | 1.5                                              | 1.7                                | 4.0                          |
| 1f46             | 1.5                                        | 2.0                          | 0.9                                                | 1.4                                | 3.9                          | 1.6                                              | 4.4                                | 4.1                          |
| 1i7p             | 0.4                                        | 0.6                          | 0.9                                                | 0.7                                | 5.0                          | 3.3                                              | 1.6                                | 1.5                          |
| 1m3s             | 5.8                                        | 5.8                          | 1.1                                                | 6.0                                | 5.4                          | 1.5                                              | 3.2                                | 4.3                          |
| 1ms9             | 1.7                                        | 1.5                          | 0.8                                                | 2.4                                | 1.8                          | 1.6                                              | 1.8                                | 1.8                          |
| 1my7             | 2.1                                        | 0.6                          | 1.5                                                | 3.1                                | 1.8                          | 4.0                                              | 1.0                                | 2.2                          |
| 1oth             | 0.6                                        | 0.5                          | 1.1                                                | 2.3                                | 3.3                          | 1.2                                              | 0.9                                | 0.7                          |
| 1oyc             | 0.6                                        | 2.0                          | 1.2                                                | 2.1                                | 2.1                          | 2.5                                              | 0.6                                | 0.7                          |
| 1qlw             | 1.1                                        | 2.0                          | 0.6                                                | 4.9                                | 5.0                          | 2.3                                              | 2.0                                | 2.3                          |
| 1t1d             | 1.3                                        | 1.5                          | 1.3                                                | 1.2                                | 2.3                          | 4.0                                              | 1.2                                | 1.3                          |
| 2pia             | 0.7                                        | 1.0                          | 1.1                                                | 0.8                                | 2.3                          | 1.2                                              | 0.8                                | 0.8                          |
| <b>Average</b>   | <b>1.7</b>                                 | <b>2.1</b>                   | <b>1.0</b>                                         | <b>2.3</b>                         | <b>3.0</b>                   | <b>2.2</b>                                       | <b>2.0</b>                         | <b>2.8</b>                   |
| <b>Std. dev.</b> | <b>1.4</b>                                 | <b>1.7</b>                   | <b>0.2</b>                                         | <b>1.5</b>                         | <b>1.5</b>                   | <b>0.9</b>                                       | <b>1.4</b>                         | <b>2.0</b>                   |

- 1) RMSD is calculated as the root-mean-square deviation of the main-chain atoms N, C<sub>α</sub>, C, and O.
- 2) Results of the lowest-energy model structures obtained by the same procedure as GalaxyLoop-PS2 but using the energy function mainly composed of knowledge-based energy terms, named here as PS-knowledge. The weight parameters are set to ( $w_{\text{Electrostatics}}, w_{\text{SA}}, w_{\phi/\psi}, w_{\chi}, w_{\text{Hbond}}, w_{\text{atom-pair}}$ ) = (0.0, 0.0, 1.2, 1.0, 4.0, 12.0).
- 3) Results of the lowest-energy model structures obtained by the same procedure as GalaxyLoop-PS2 but using the energy function composed of only physical energy terms, named here as PS-physics. The weight parameters are set to ( $w_{\text{Electrostatics}}, w_{\text{SA}}, w_{\phi/\psi}, w_{\chi}, w_{\text{Hbond}}, w_{\text{atom-pair}}$ ) = (0.25, 0.02, 0.0, 0.0, 0.0, 0.0).

4) The all-atom RMSD of the environment is as defined in Results and Discussion.
