# Supplementary material for: Protein Loop Modeling Using a New Hybrid Energy Function and Its Application to Modeling in Inaccurate Structural Environments
Source: PubMed Central journal article supplement (PMC4242723; doi:10.1371/journal.pone.0113811), 2014-11-24
Supplement: pone.0113811.s009.pdf [file pone.0113811.s009.pdf]

**Table S8. Loop modeling results for the 12-residue loop Set 1 in three different environments with a smaller number of CSA bank size ( $N = 30$  instead of  $N = 50$ ).**

| PDB ID           | Native framework<br>RMSD (Å) <sup>1)</sup> |                                         | Side chain-perturbed set<br>RMSD (Å) <sup>1)</sup> |                                       |                                         | Backbone-perturbed set<br>RMSD (Å) <sup>1)</sup> |                                       |                                         |
|------------------|--------------------------------------------|-----------------------------------------|----------------------------------------------------|---------------------------------------|-----------------------------------------|--------------------------------------------------|---------------------------------------|-----------------------------------------|
|                  | Galaxy<br>PS2<br>bank30 <sup>2)</sup>      | Best<br>sampled<br>(rank) <sup>3)</sup> | E-<br>RMSD<br>(Å) <sup>4)</sup>                    | Galaxy<br>PS2<br>bank30 <sup>2)</sup> | Best<br>sampled<br>(rank) <sup>3)</sup> | E-<br>RMSD<br>(Å) <sup>4)</sup>                  | Galaxy<br>PS2<br>bank30 <sup>2)</sup> | Best<br>sampled<br>(rank) <sup>3)</sup> |
| 1a8d             | 3.1                                        | 1.3 (3)                                 | 0.7                                                | 0.6                                   | 0.6 (1)                                 | 1.6                                              | 2.2                                   | 2.1 (10)                                |
| 1arb             | 1.1                                        | 1.1 (1)                                 | 0.9                                                | 1.4                                   | 1.4 (1)                                 | 2.3                                              | 1.9                                   | 1.3 (4)                                 |
| 1bhe             | 1.3                                        | 1.3 (1)                                 | 0.8                                                | 2.1                                   | 1.0 (6)                                 | 1.2                                              | 3.2                                   | 2.2 (9)                                 |
| 1bn8             | 1.4                                        | 0.8 (4)                                 | 0.7                                                | 1.5                                   | 1.1 (3)                                 | 3.4                                              | 1.2                                   | 1.1 (8)                                 |
| 1c5e             | 2.0                                        | 0.8 (3)                                 | 0.7                                                | 2.0                                   | 0.6 (24)                                | 1.5                                              | 2.5                                   | 1.0 (2)                                 |
| 1cb0             | 0.5                                        | 0.5 (1)                                 | 0.8                                                | 0.5                                   | 0.5 (1)                                 | 2.7                                              | 0.9                                   | 0.9 (4)                                 |
| 1cnv             | 2.4                                        | 2.1 (9)                                 | 0.7                                                | 2.4                                   | 2.4 (1)                                 | 3.0                                              | 6.5                                   | 5.6 (10)                                |
| 1cs6             | 3.6                                        | 1.7 (7)                                 | 1.1                                                | 2.9                                   | 2.6 (20)                                | 1.8                                              | 1.5                                   | 1.5 (2)                                 |
| 1dqz             | 0.9                                        | 0.9 (1)                                 | 1.2                                                | 6.2                                   | 3.7 (12)                                | 1.9                                              | 6.1                                   | 2.0 (12)                                |
| 1exm             | 4.0                                        | 2.8 (22)                                | 0.8                                                | 3.0                                   | 1.5 (12)                                | 1.5                                              | 1.6                                   | 1.5 (3)                                 |
| 1f46             | 2.0                                        | 1.7 (16)                                | 0.9                                                | 1.9                                   | 1.6 (5)                                 | 1.6                                              | 2.8                                   | 2.8 (18)                                |
| 1i7p             | 0.3                                        | 0.3 (1)                                 | 0.9                                                | 0.5                                   | 0.5 (1)                                 | 3.3                                              | 4.1                                   | 1.8 (3)                                 |
| 1m3s             | 6.0                                        | 4.8 (26)                                | 1.1                                                | 5.5                                   | 4.1 (26)                                | 1.5                                              | 6.0                                   | 2.2 (19)                                |
| 1ms9             | 1.7                                        | 0.9 (17)                                | 0.8                                                | 1.6                                   | 0.8 (11)                                | 1.6                                              | 1.8                                   | 1.0 (27)                                |
| 1my7             | 0.5                                        | 0.5 (1)                                 | 1.5                                                | 1.0                                   | 1.0 (1)                                 | 4.0                                              | 2.4                                   | 0.9 (2)                                 |
| 1oth             | 0.5                                        | 0.5 (2)                                 | 1.1                                                | 2.3                                   | 1.8 (2)                                 | 1.2                                              | 0.8                                   | 0.8 (1)                                 |
| 1oyc             | 2.1                                        | 1.6 (7)                                 | 1.2                                                | 1.1                                   | 1.1 (1)                                 | 2.5                                              | 0.9                                   | 0.9 (1)                                 |
| 1qlw             | 4.8                                        | 2.7 (8)                                 | 0.6                                                | 4.1                                   | 3.3 (30)                                | 2.3                                              | 1.4                                   | 1.4 (1)                                 |
| 1t1d             | 2.6                                        | 1.5 (2)                                 | 1.3                                                | 2.4                                   | 1.1 (18)                                | 4.0                                              | 2.5                                   | 2.1 (3)                                 |
| 2pia             | 0.7                                        | 0.7 (1)                                 | 1.1                                                | 0.8                                   | 0.8 (1)                                 | 1.2                                              | 0.8                                   | 0.8 (1)                                 |
| <b>Average</b>   | <b>2.1</b>                                 | <b>1.4 (6.7)</b>                        | <b>1.0</b>                                         | <b>2.2</b>                            | <b>1.6 (8.9)</b>                        | <b>2.2</b>                                       | <b>2.6</b>                            | <b>1.7 (7.0)</b>                        |
| <b>Std. dev.</b> | <b>1.5</b>                                 | <b>1.0 (7.5)</b>                        | <b>0.2</b>                                         | <b>1.5</b>                            | <b>1.1 (9.5)</b>                        | <b>0.9</b>                                       | <b>1.7</b>                            | <b>1.0 (7.1)</b>                        |

- 1) RMSD is calculated as the root-mean-square deviation of the main-chain atoms N, C<sub>α</sub>, C, and O.
- 2) Results of the lowest-energy model structures obtained by the same procedure as GalaxyLoop-PS2 but using a smaller number of CSA bank members ( $N = 30$ )
- 3) RMSDs of the lowest-RMSD model structures and their energy ranks in the final bank
- 4) The all-atom RMSD of the environment is as defined in Results and Discussion.
