# Supplementary material for: Protein Loop Modeling Using a New Hybrid Energy Function and Its Application to Modeling in Inaccurate Structural Environments
Source: PubMed Central journal article supplement (PMC4242723; doi:10.1371/journal.pone.0113811), 2014-11-24
Supplement: pone.0113811.s011.pdf [file pone.0113811.s011.pdf]

**Table S10. Correlation between energy and decoy loop RMSD calculated using different subsets of energy components.**

| Component                         | Energy function subset |                  |                      |                        |                        |                 |            |                    |                        | Correlation <sup>2)</sup> |
|-----------------------------------|------------------------|------------------|----------------------|------------------------|------------------------|-----------------|------------|--------------------|------------------------|---------------------------|
|                                   | $E_{\text{bonded}}$    | $E_{\text{vdW}}$ | $E_{\text{Coulomb}}$ | $E_{\text{FACTS, GB}}$ | $E_{\text{FACTS, SA}}$ | $E_{\phi/\psi}$ | $E_{\chi}$ | $E_{\text{Hbond}}$ | $E_{\text{atom-pair}}$ |                           |
| Weight combinations <sup>1)</sup> | 1.0                    | 1.0              | -                    | -                      | -                      | -               | -          | -                  | -                      | 0.03                      |
|                                   | -                      | -                | 0.16                 | 0.16                   | -                      | -               | -          | -                  | -                      | 0.10                      |
|                                   | -                      | -                | -                    | -                      | 0.05                   | -               | -          | -                  | -                      | 0.12                      |
|                                   | -                      | -                | 0.16                 | 0.16                   | 0.05                   | -               | -          | -                  | -                      | 0.22                      |
|                                   | -                      | -                | -                    | -                      | -                      | -               | -          | -                  | 12.0                   | 0.52                      |
|                                   | -                      | -                | -                    | -                      | -                      | 1.2             | -          | -                  | 12.0                   | 0.48                      |
|                                   | -                      | -                | -                    | -                      | -                      | -               | 1.0        | -                  | 12.0                   | 0.52                      |
|                                   | -                      | -                | -                    | -                      | -                      | -               | -          | 4.0                | 12.0                   | 0.48                      |
|                                   | -                      | -                | -                    | -                      | -                      | 1.2             | 1.0        | 4.0                | 12.0                   | 0.47                      |
|                                   | -                      | -                | 0.16                 | 0.16                   | -                      | -               | -          | -                  | 12.0                   | 0.52                      |
|                                   | -                      | -                | 0.16                 | 0.16                   | -                      | -               | 1.0        | -                  | 12.0                   | 0.52                      |
|                                   | -                      | -                | 0.16                 | 0.16                   | 0.05                   | -               | 1.0        | -                  | 12.0                   | 0.50                      |
| -                                 | -                      | 0.16             | 0.16                 | 0.05                   | 1.2                    | 1.0             | 4.0        | 12.0               | 0.46                   |                           |

- 1) Energy weight used for each component to generate different subsets of the energy components
- 2) Pearson correlation coefficient calculated between the training set decoy loop C $\alpha$  RMSD and energy and averaged over the training set loops
